# Supplementary material for: Characterization of Erysiphe necator-Responsive Genes in Chinese Wild Vitis quinquangularis
Source: PubMed Central journal article supplement (PMC3472759; doi:10.3390/ijms130911497), 2012-09-12
Supplement: ijms-13-11497-s002.pdf [file ijms-13-11497-s002.pdf]

## Supplementary Information

**Table S2.** Primer sequences used for gene expression analysis by qRT-PCR.

| Unigene No. | Gene Name                   |   | Primers Sequence (5'–3')  | Product Length (bp) |
|-------------|-----------------------------|---|---------------------------|---------------------|
| UN044       | SAMS                        | F | GAGACTTGCACGAAGACCAACA    | 125                 |
|             |                             | R | CCCACATCGTCAGATACAAATCC   |                     |
| UN073       | Thaumatococcus-like protein | F | TCGCACTTAACCAATTCAGCA     | 90                  |
|             |                             | R | TGGAAGTAGGATTAAGGCCGTAG   |                     |
| UN116       | SAP                         | F | CGGCTACATCCACCAACTCT      | 122                 |
|             |                             | R | AACCTTCTTCCAATCACGCTTC    |                     |
| UN134       | COI1                        | F | AGATGAGGGGCTGTTGCTTC      | 92                  |
|             |                             | R | TCTATACCCTTGCACCCACAAA    |                     |
| UN135       | F-box family protein        | F | GTGTCTGATGGATCTTGGGTTTC   | 133                 |
|             |                             | R | CCCTCATTCTTCTCCTCCACTATTC |                     |
| UN174       | Class IV chitinase          | F | AAATGCTTCCCTTCGCAGTT      | 85                  |
|             |                             | R | GTGTCTCCGTTGCTGATGTTG     |                     |
| UN182       | CHI                         | F | TCCAGGTCAAGTTCACAGCAA     | 87                  |
|             |                             | R | CCTTTCAGATTTACCCTTCCA'    |                     |
| UN203       | JAZ2                        | F | GGCACATTCAGGGGATTTCTT     | 90                  |
|             |                             | R | GCATCCTTGGCTCGGTTTT       |                     |
| UN260       | PAL                         | F | CAATCCAGAAGAGGGTCGATG     | 102                 |
|             |                             | R | AGGGCTGCTGACTGGTGAA       |                     |
| UN113       | no hits found               | F | GGGCATTCAGTGCTGGATTTA     | 158                 |
|             |                             | R | GCGGCTTTGGTCTTTGATTTG     |                     |
| UN168       | no hits found               | F | GGAAGGGTTCGTGGGAGGTT      | 269                 |
|             |                             | R | CCAAAATGAACTGGAAGCAGAAGA  |                     |
| UN235       | no hits found               | F | CATCTCCTCAGCCCACAATTAGC   | 193                 |
|             |                             | R | TGATCGTCAGTCGCAAGAAAGC    |                     |
| UN103       | no hits found               | F | GCAAGAGCTGTGGAATTTATCGT   | 147                 |
|             |                             | R | TTGTTGTTGGTCCGTAGTGGC     |                     |
